# Supplementary material for: Enhanced reliability of aluminum–sulfur batteries with cost-effective ionic liquid electrolyte and sulfur/graphite cathode
Source: Royal Society of Chemistry journal article supplement (doi:10.1039/d3nj05853k), 2024-01-01
Supplement: d3nj05853k1.pdf [file d3nj05853k1.pdf]

## Enhanced Reliability of Aluminium-Sulfur Batteries with Cost-effective Ionic Liquid Electrolyte and Sulfur/Graphite Cathode

Mohan Gorle<sup>a, b</sup> and Vatsala Rani Jetti<sup>\*ab</sup>

<sup>a</sup>Polymers and Functional Materials, CSIR-Indian Institute of Chemical Technology,  
Hyderabad-500007, India.

<sup>b</sup>Academy of Scientific and Innovative Research (AcSIR), Ghaziabad-201002, India.

\*Dr. Jetti Vatsala Rani, † E-mail: [vatsala@iict.res.in](mailto:vatsala@iict.res.in)

**Table S1:** Comparison of recent Al-S battery performance in terms of cathode material and electrolyte

| Reference                           | Cathode composition                                                                          | Electrolyte                                                                 | Sulfur Content (% wt) | Sulfur Loading (mg cm <sup>-2</sup> ) | Cycle | Specific Current (mA g <sup>-1</sup> ) | Initial to final Discharge capacity (mAh g <sup>-1</sup> ) | Discharge Voltage (V) |
|-------------------------------------|----------------------------------------------------------------------------------------------|-----------------------------------------------------------------------------|-----------------------|---------------------------------------|-------|----------------------------------------|------------------------------------------------------------|-----------------------|
| 2015 <sup>[1]</sup>                 | Mixture of S and ketjen black, PVDF (50:30:20) on stainless steel (non-rechargeable)         | EMIMCl-AlCl <sub>3</sub> (1:1.5)                                            | 50                    | 1.1                                   | 1     | 30                                     | 1400                                                       | 1.2                   |
| 2018 <sup>[2]</sup>                 | Spreading the mixture of S and ionic liquid electrolyte onto activated CNF paper (S:CNF=1:2) | EMIMCl-AlCl <sub>3</sub> (1:1.3)                                            | 33                    | 1.0                                   | 50    | 30 (C/50)                              | 1000–600                                                   | 1.05                  |
| 2020 <sup>[3]</sup>                 | S on activated carbon cloth and Co catalyst                                                  | EMIMCl-AlCl <sub>3</sub> (1:1.3)                                            | n/a                   | 0.8-1.0                               | 100   | 1000                                   | 1320–500                                                   | 0.65                  |
| 2017 <sup>[4]</sup>                 | Spreading the mixture of S and ionic liquid electrolyte onto activated CNF paper (S:CNF=1:2) | 0.5M LiCF <sub>3</sub> SO <sub>3</sub> in EMIMCl-AlCl <sub>3</sub> (1:1.25) | 33                    | 1.0                                   | 1     | 30 (C/50)                              | 1250                                                       | 0.76                  |
| H. Yang et. Al, 2018 <sup>[5]</sup> | S, CMK-3, Ketjen black, PTFE (40:40:10:10)                                                   | NBMP/EMIMBr-AlCl <sub>3</sub> (1:1.3)                                       | 40                    | n/a                                   | 20    | 251                                    | 1500–400                                                   | 0.5                   |
| Y. Bian et. al, 2018 <sup>[6]</sup> | S, MWCNT, Polyacrylic latex (10:80:10) on Ni foil                                            | Urea-AlCl <sub>3</sub> (1:1.4)                                              | 10                    | 0.42                                  | 100   | 1000                                   | 740–500                                                    | 1.7                   |

|                                            |                                                                                          |                                        |           |                |           |                          |                                    |            |
|--------------------------------------------|------------------------------------------------------------------------------------------|----------------------------------------|-----------|----------------|-----------|--------------------------|------------------------------------|------------|
| W. Wang et. al, 2018 <sup>[7]</sup>        | Sulfurized Polyacrylonitrile (SPAN) and PTFE (80:10:10) on carbon paper.                 | EMIMCl-AICl <sub>3</sub> (1:1.5)       | 10        | 0.12           | 22        | 25                       | 320–200                            | 0.3        |
| W. Chu et. al, 2019 <sup>[8]</sup>         | S,CMK-3 1:1, with 10 % PTFE and 10 % Super C on Mo foil                                  | Acetamide-AICl <sub>3</sub> (1:13)     | 40        | 0.25           | 60        | 100                      | 1500–500                           | 0.55       |
| K. Zhang et. al, 2019 <sup>[9]</sup>       | BN/S/C (6:1:2) with 10 % PVDF coated on Pt coated OHP organic                            | EMIMCl-AICl <sub>3</sub> (1:1.3)       | 10        | 0.3            | 100       | 100                      | 532–100                            | 1.15       |
| Johan Lampkin et. al, 2020 <sup>[10]</sup> | S,CNT with PEO and PVP coated on Mo foil (58.8:29.4:9:3.9)                               | EMIMCl-AICl <sub>3</sub> (1:1.5)       | 58.8      | 0.4-3.5        |           | 50                       | 1404                               | 0.31       |
| Johan Lampkin et. al, 2020 <sup>[10]</sup> | S,CNT with PEO and PVP coated on Mo foil (58.8:29.4:9:3.9)                               | Acetamide-AICl <sub>3</sub> (1:13)     | 58.8      | 0.4-3.5        |           | 50                       | 2129                               | 0.42       |
| Johan Lampkin et. al, 2020 <sup>[10]</sup> | S,CNT with PEO and PVP coated on Mo foil (58.8:29.4:9:3.9)                               | Urea-AICl <sub>3</sub> (1:1.4)         | 58.8      | 0.4-3.5        |           | 50                       | 2359                               | 0.41       |
| <b>This work</b>                           | <b>Sulfur-graphite active material and Super-p and PVDF (80:10:10) coated on SS Mesh</b> | <b>EMIMCl-AICl<sub>3</sub> (1:1.3)</b> | <b>70</b> | <b>0.8-1.0</b> | <b>50</b> | <b>200</b><br><b>300</b> | <b>1147–1281</b><br><b>947–600</b> | <b>1.8</b> |

## Characterization of cathode material pre and post electrochemical analysis:

### TGA:

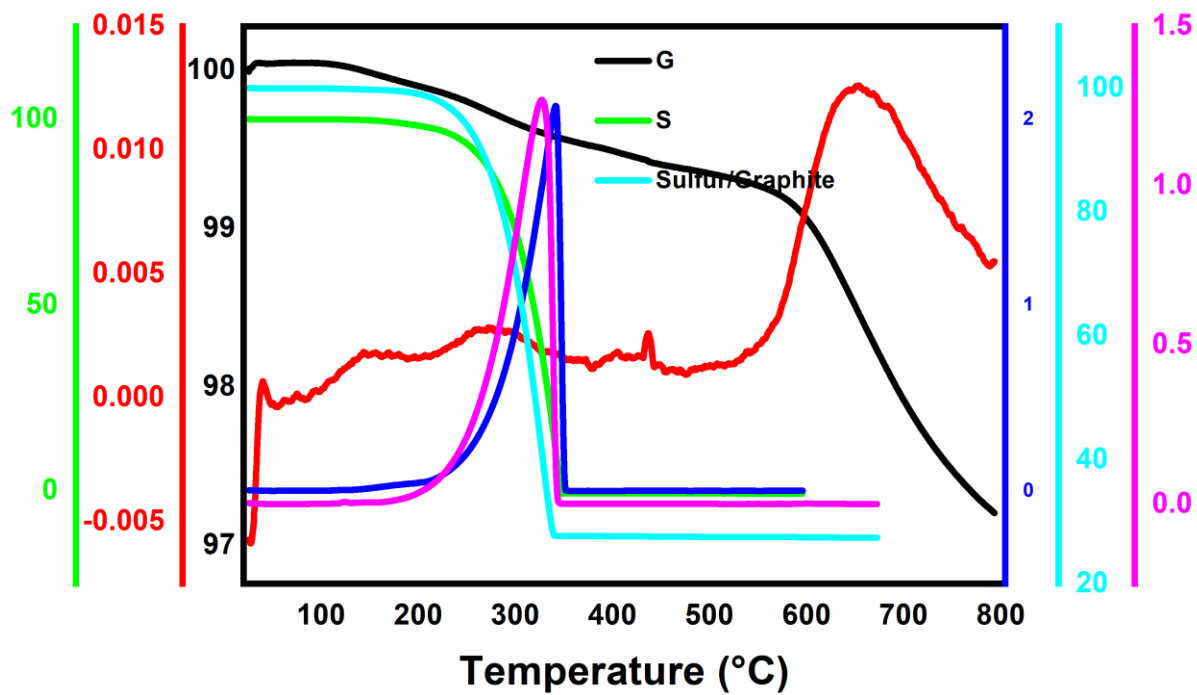

**Fig. S1:** TGA of sulfur, commercially procured graphite and composite S@Gf

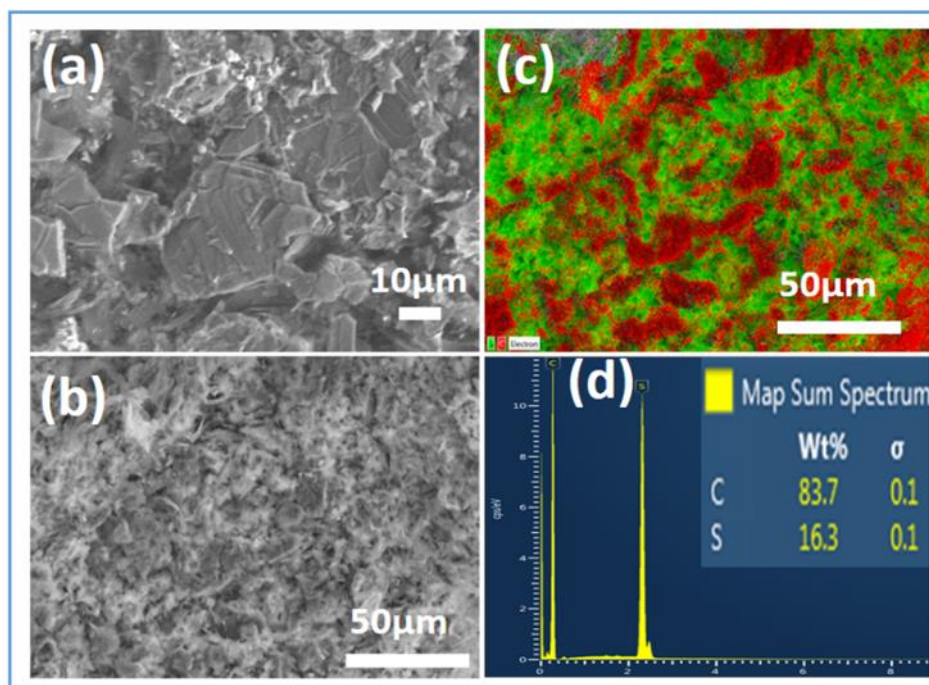

**Fig. S2:** Composite S@Gf SEM and EDAX and EDAX Mapping.

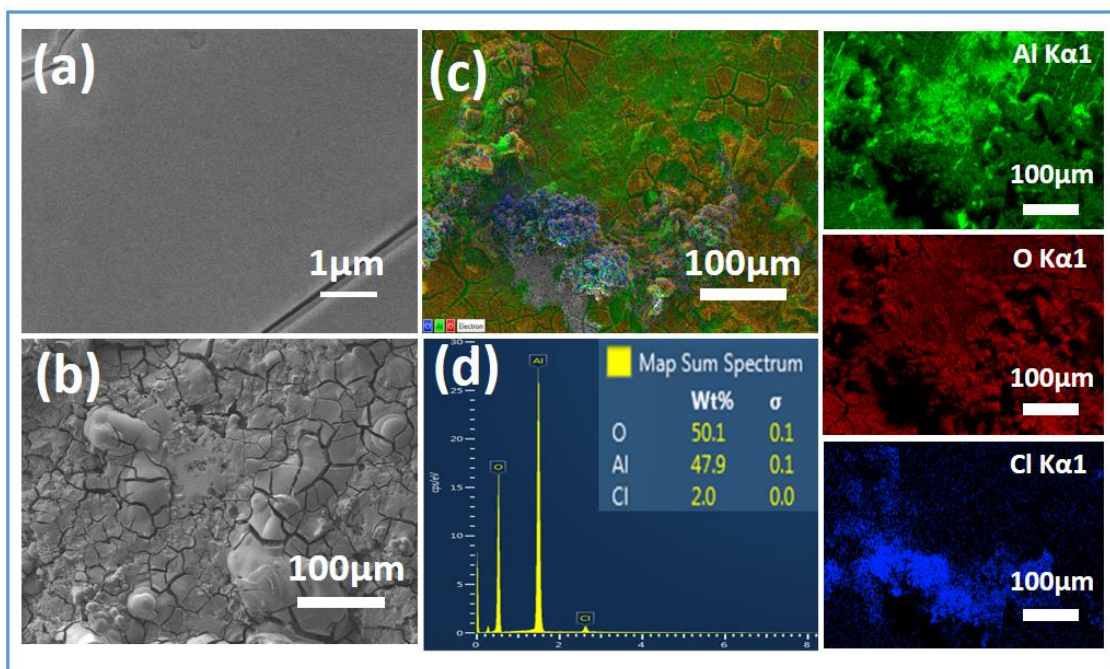

**Fig. S3:** (a-b) FE-SEM images of charge state aluminium anode at 2.0 V, (c-d) EDAX and EDAX mapping

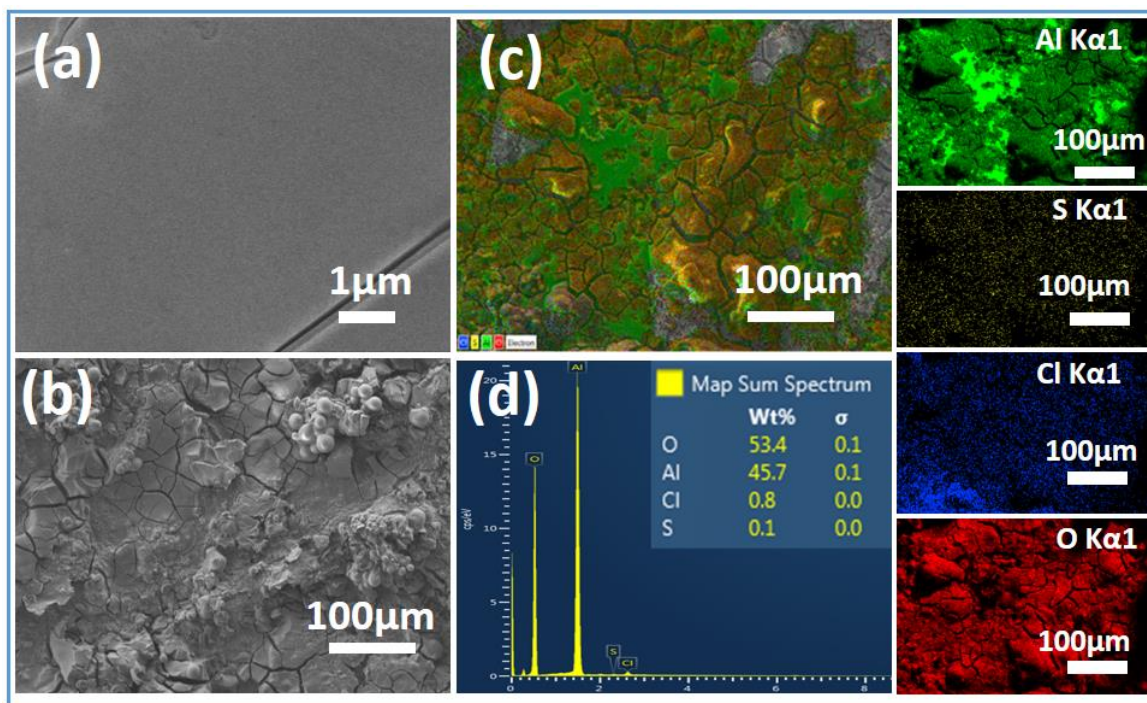

**Fig. S4:** (a-b) FE-SEM low magnification and high magnification and (c-d) EDAX and EDAX mapping at discharge state anode (Al) 0.1 V state

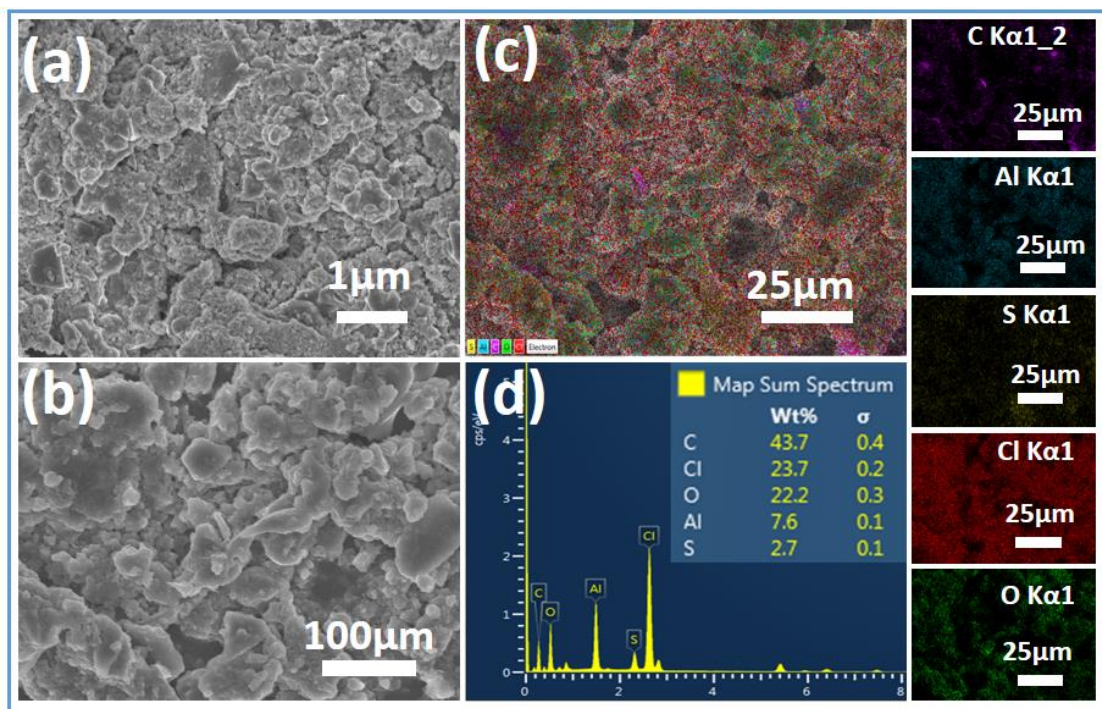

**Fig. S5:** (a-b) ) EDAX and (c-d) mapping of Charge state cathode at 2.0 V FE-SEM low magnification and high magnification of S@Gf cathode material.

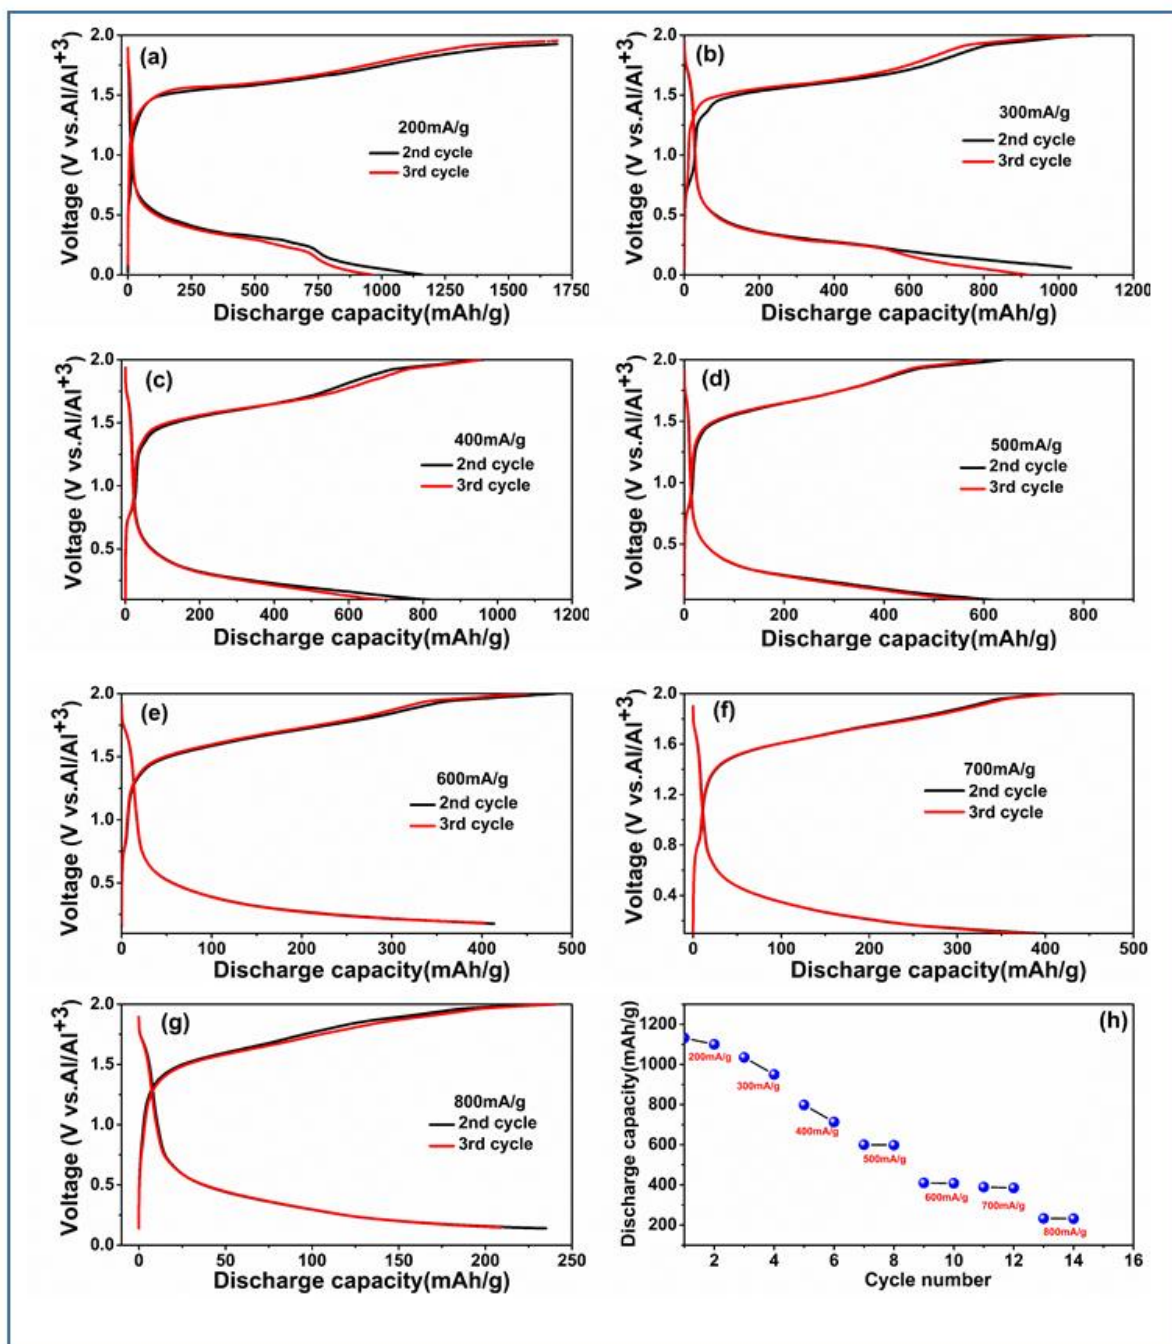

**Fig. S6** Charge discharge performance at current rate a) 200, b) 300, c) 400, d) 500, e) 600, f) 700, g) 800 mA/g and h) Discharge capacity vs. Cycle number.

## References:

- 1 G. Cohn, L. Ma, L. A. Archer, *J. Power Sources* 2015, **283**, 416.
- 2 X. Yu, M. J. Boyer, G. S. Hwang, A. Manthiram, *Chem* 2018, **4**, 586.
- 3 Y. Guo, Z. Hu, J. Wang, Z. Peng, J. Zhu, H. Ji, L. J. Wan, *Angew. Chem. Int. Ed. Engl.* 2020, **59**, 22963.
- 4 X. Yu, A. Manthiram, *Advanced Energy Materials* 2017, **7**.
- 5 H. Yang, L. Yin, J. Liang, Z. Sun, Y. Wang, H. Li, K. He, L. Ma, Z. Peng, S. Qiu, C. Sun, H.-M. Cheng, F. Li, 2018, **57**, 1898.
- 6 Y. Bian, Y. Li, Z. Yu, H. Chen, K. Du, C. Qiu, G. Zhang, Z. Lv, M.-C. Lin, *ChemElectroChem*, 2018, **5**, 3607.
- 7 W. Wang, Z. Cao, G. A. Elia, Y. Wu, W. Wahyudi, E. Abou-Hamad, A.-H. Emwas, L. Cavallo, L.-J. Li, J. Ming, *ACS Energy Letters*, 2018, **3**, 2899.
- 8 W. Chu, X. Zhang, J. Wang, S. Zhao, S. Liu, H. Yu, *Energy Storage Materials* 2019, **22**, 418.
- 9 K. Zhang, T. H. Lee, J. H. Cha, R. S. Varma, J. W. Choi, H. W. Jang, M. Shokouhimehr, *Sci Rep* 2019, **9**, 13573.
- 10 J. Lampkin, H. Li, L. Furness, R. Raccichini, N. Garcia-Araez, *ChemSusChem* 2020, **13**, 3514.
